# Supplementary material
Source: MDPI journal article supplement (https://www.mdpi.com/2076-3263/10/10/398)
Supplement: s1 [file s1]

**Supplementary Materials: S1.** Background information on use of soil improvers and chemicals on allotments included in the NABS study. (All percentages reported are of the total number of gardeners in the study (n = 43)). A share of 28% of gardeners reported use of chemicals on their gardens; pesticide sprays (5%), slug killers (9%), herbicide treatments (9%), fungicide treatment (2%) and chemical fertiliser (5%). Five percent used chemical fertiliser and pesticide spray, 2% used herbicide and fungicide and 5% used both metaldehyde and ferric phosphate slug killer. Gardeners using pesticide either used it once a year or when needed between June and September. Those using slug killer reported using it either once a month or three times a year. Herbicides were applied twice a year, fungicides only in spring, and chemical fertiliser once a week in the season between June and September. For soil improvement, 37% of gardeners reported adding compost, 70% manure and 70% soil improver. Where the compost source was specified 26% used “homemade” compost, 7% purchased it from a garden centre and 11% purchased it from the local authority or allotment association. Manure sources were either not specified (12%) or the allotment association (14%). Seven percent of gardeners used cow manure, 40% used horse manure. Reported soil improver sources were the local authority (9%) and the allotment association (5%). Compost and manure were usually added once a year (both 47%), alternatives being every two years or one to two years (4% and 17% for compost and manure, respectively), every two years or two to three years (2% and 19%), or with every new crop (2% manure only) or growing season (2% both). Soil improver was usually added every two to three years (7%) alternatively with each new crop (2%). Other natural soil amendments used were “poultry concentrate” (5%) “blood, fish and bone” (5%), stables straw (2%), biochar (2%) and rock dust (2%). Specific details on each of the allotments (1, 2 and 3) and the sampled plot (X.1) investigated in this study are provided in Table S1.

**Table S1.** Specific details on the use of chemicals, soil improvers and other common activities at urban agricultural sites (UAS) for each of the soils investigated in this study.

| Soil Sample | Chemical / Pesticide                                |         |          | Compost/ Soil Improver/ Manure 1            |               |          | Compost/ Soil Improver / Manure 2           |         |          | Compost/ Soil Improver / Manure 3           |               |          | Do poultry have free access to soil? |         | Bonfires Held on Site? | old window frames on site? |
|-------------|-----------------------------------------------------|---------|----------|---------------------------------------------|---------------|----------|---------------------------------------------|---------|----------|---------------------------------------------|---------------|----------|--------------------------------------|---------|------------------------|----------------------------|
|             | D = description<br>F = Frequency<br>T = time period |         |          | M = material<br>S = source<br>F = Frequency |               |          | M = material<br>S = source<br>F = Frequency |         |          | M = material<br>S = source<br>F = Frequency |               |          | Y= yes<br>N = No                     |         |                        |                            |
|             |                                                     |         |          |                                             |               |          |                                             |         |          |                                             |               |          |                                      |         |                        |                            |
|             | D                                                   | F       | T        | M                                           | S             | F        | M                                           | S       | F        | M                                           | S             | F        |                                      | species |                        |                            |
| 1.1         |                                                     |         |          | compost                                     | garden centre | annually | manure                                      | horse   | 2x year  | Soil improver                               | garden centre | annually | N                                    |         | none                   | none                       |
| 1.2         | weedol                                              | 2x year | 10 years | manure                                      | horse         | annually | Straw                                       | Stables | annually | Compost                                     | Homemade      | annually | Y                                    | hen     | frequent               | a few                      |

|     |                 |            |                 |                  |                          |                                 |                                                       |                          |                                 |         |          |          |   |     |          |         |
|-----|-----------------|------------|-----------------|------------------|--------------------------|---------------------------------|-------------------------------------------------------|--------------------------|---------------------------------|---------|----------|----------|---|-----|----------|---------|
| 1.3 | N/A             |            |                 | manure           | horse                    | annually                        | Poultry<br>Concentrate<br><br>Blood, fish<br>and Bone |                          | annually                        | Compost | homemade | annually | Y | hen | frequent | unknown |
| 1.4 | N/A             |            |                 | manure           | horse                    | annually                        | Poultry<br>Concentrate<br><br>Blood, fish<br>and Bone |                          | annually                        | Compost | homemade | annually | Y | hen | frequent | unknown |
| 1.5 | Roundup         | 2x year    | one<br>spraying | rock dust        | rock dust                | annually                        |                                                       |                          |                                 |         |          |          | N |     | unknown  | unknown |
| 2.1 |                 |            |                 | manure           | allotment<br>association | 1-2x year                       |                                                       |                          |                                 |         |          |          | N |     | a few    | a few   |
| 2.2 |                 |            |                 | compost          | homemade                 | annually                        | manure                                                | allotment<br>association | annually                        |         |          |          | N |     | a few    | a few   |
| 2.3 |                 |            |                 | compost          | homemade                 | throughout<br>growing<br>season | manure                                                | chicken                  | throughout<br>growing<br>season |         |          |          | N |     | none     | none    |
| 3.1 |                 |            |                 |                  |                          |                                 |                                                       |                          |                                 |         |          |          | N |     | a few    | a few   |
| 3.2 |                 |            |                 | unknown          | garden<br>centre         |                                 |                                                       |                          |                                 |         |          |          | N |     | a few    | unknown |
| 3.3 |                 |            |                 | unknown          |                          | annually                        |                                                       |                          |                                 |         |          |          | N |     | a few    | a few   |
| 3.4 | miracle<br>grow | 1x<br>week | june -<br>sep   | soil<br>improver | council                  | 2 years ago                     | compost                                               | garden<br>centre         | 2-4 years<br>ago                | manure  | local    | annually | N |     | a few    | a few   |

|  |              |                |  |  |  |  |  |          |          |  |  |  |  |  |  |  |
|--|--------------|----------------|--|--|--|--|--|----------|----------|--|--|--|--|--|--|--|
|  | Bug<br>spray | when<br>needed |  |  |  |  |  | homemade | annually |  |  |  |  |  |  |  |
|--|--------------|----------------|--|--|--|--|--|----------|----------|--|--|--|--|--|--|--|
